# Supplementary material for: Combined wet milling and heat treatment in water vapor for producing amorphous to crystalline ultrafine Li1.3Al0.3Ti1.7(PO4)3 solid electrolyte particles
Source: RSC Adv. 2021 Apr 21;11(24):14796–804. doi: 10.1039/d1ra02039k (PMC8697808; doi:10.1039/d1ra02039k)
Supplement: RA-011-D1RA02039K-s001 [file RA-011-D1RA02039K-s001.pdf]

# Combined wet milling and heat treatment in water vapor for producing amorphous to crystalline ultrafine $\text{Li}_{1.3}\text{Al}_{0.3}\text{Ti}_{1.7}(\text{PO}_4)_3$ solid electrolyte particles

Takahiro Kozawa\*

Joining and Welding Research Institute, Osaka University, 11-1 Mihogaoka, Ibaraki, Osaka  
567-0047, Japan

\*E-mail: t-kozawa@jwri.osaka-u.ac.jp

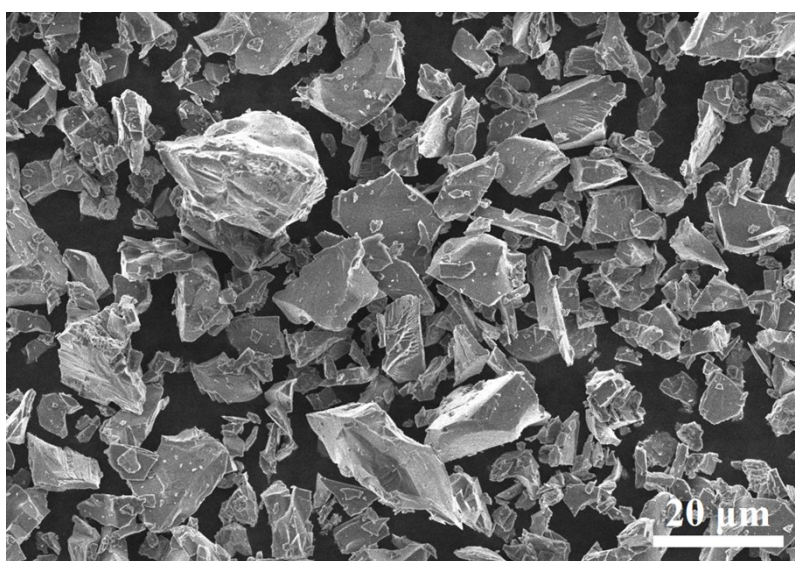

**Figure S1** SEM image of the starting LATP powder.

**Table S1** Impurities reported by manufacturer.

| Element | Ca     | Cr      | Fe     | Mg     | Zn     |
|---------|--------|---------|--------|--------|--------|
| mass%   | 0.0091 | <0.0005 | 0.0032 | 0.0017 | 0.0005 |

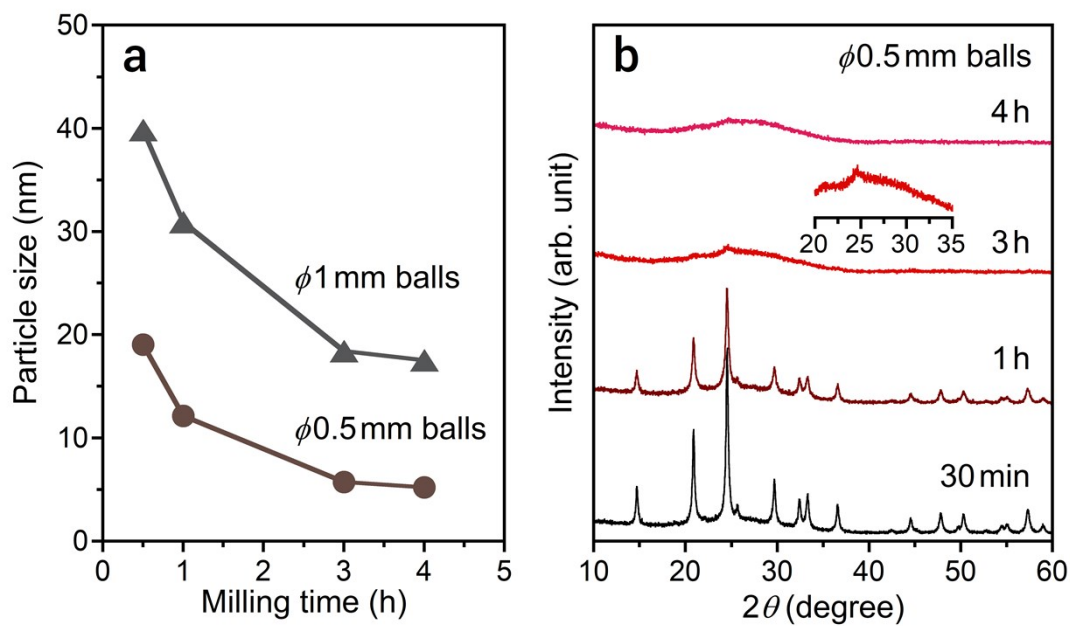

**Figure S2** (a) Effect of ball size and milling time on the particle size of the milled products. (b) XRD patterns of the products obtained through wet planetary ball milling.

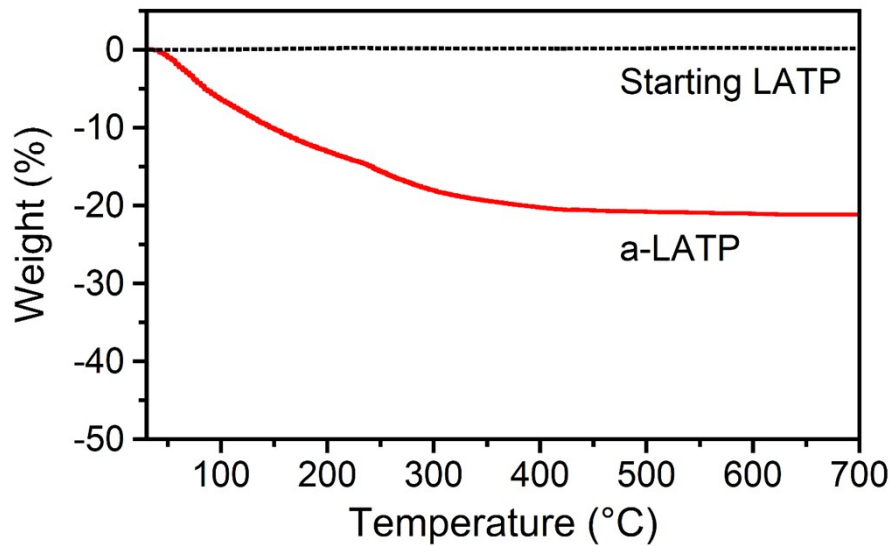

**Figure S3** TG curves of the starting LATP and a-LATP powders.

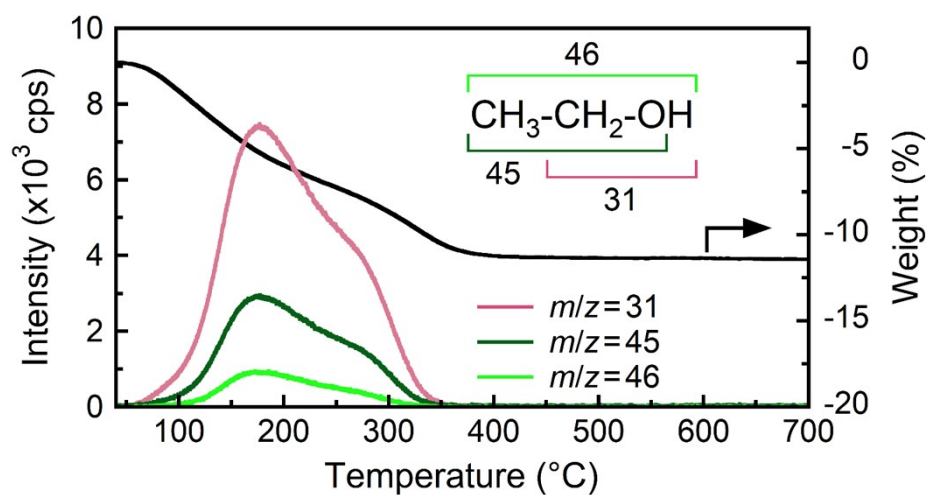

**Figure S4** TG-MS profiles of a-LATP obtained using the EI method under pure He flow.

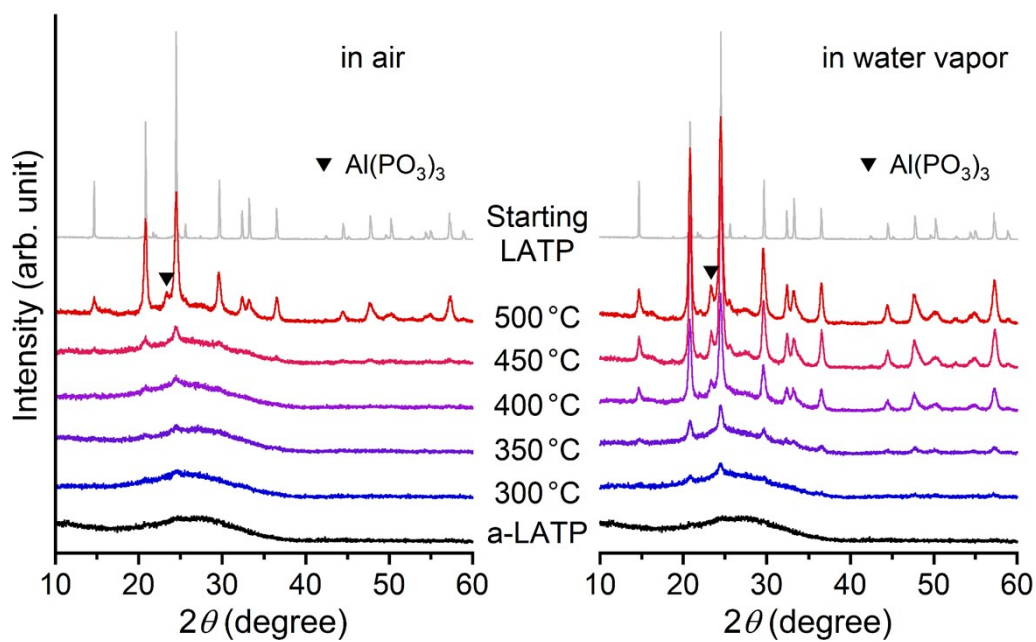

**Figure S5** XRD patterns of the a-LATP products heated in air and water vapor.

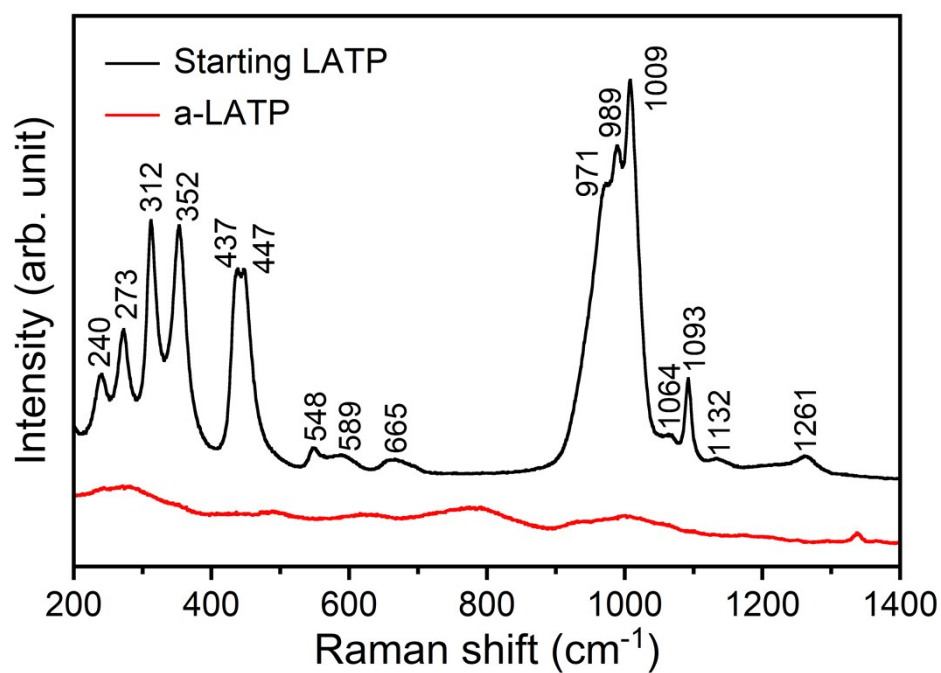

**Figure S6** Raman spectra of the starting LATP and a-LATP powders.

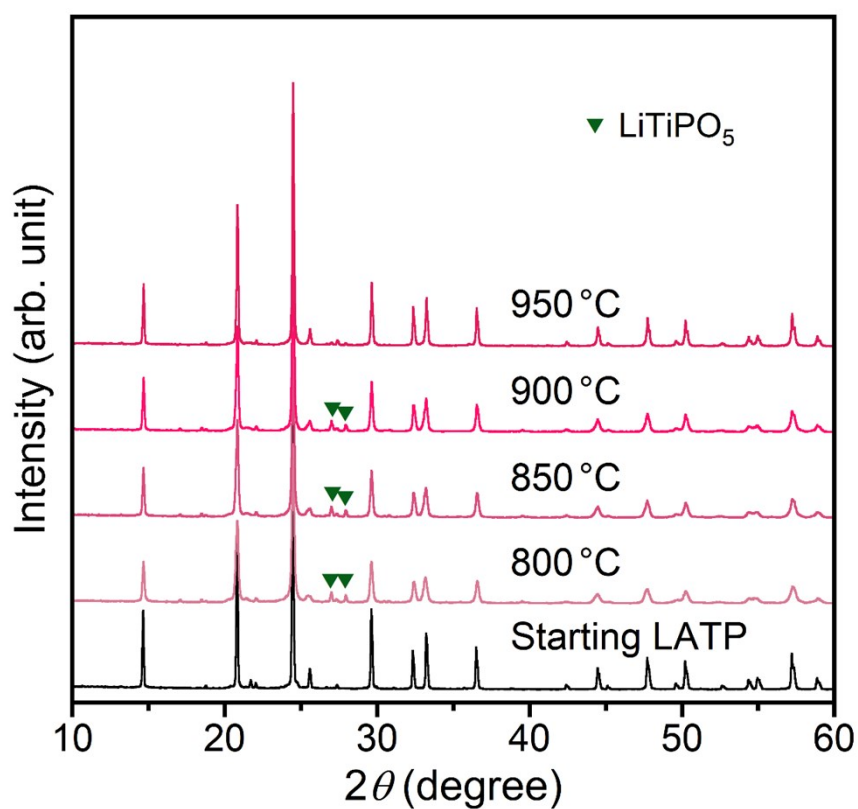

**Figure S7** XRD patterns of the LATP compacts sintered at different temperatures.
